# Supplementary material for: Antimicrobial activity of Ruta angustifolia L. Pers against periodontal pathogen: Porphyromonas gingivalis
Source: PeerJ. 2024 Dec 18;12:e18751. doi: 10.7717/peerj.18751 (PMC11662893; doi:10.7717/peerj.18751)
Supplement: Supplemental Information 1 — Raw data for the inhibition zone diameter (mm). 0.12% CHX served as the positive control, whilst 1% DMSO as the negative control against P. gingivalis. Experiments were conducted in triplicate and tabulated values are represented as mean ± standard deviation. Statistically significant with Kruskal-Wallis (p-value < 0.05) and Dunn’s post-hoc analysis (*p < 0.05 versus control according to analysis of variance). [file peerj-12-18751-s001.xlsx]

## Sheet: Sheet1
Table 1: The inhibition zone diameters of R. angustifolia extracts against P. gingivalis.
Microorganisms	R. angustifolia extracts	Concentrations (mg/mL)	Inhibition zone diameter (mm)	Mean	Stdev
P. gingivalis	Crude Methanol	50	7.88	8.11667	0.772679
			8.98
			7.49
		100	9.36	9.3	0.255343
			9.52
			9.02
		CHX	14.46	13.7867	0.712835
			13.86
			13.04
	Hexane	50	7	6.97667	0.255799
			6.71
			7.22
		100	7.97	8.19333	0.274651
			8.11
			8.5
		CHX	13.25	13.4533	0.785005
			14.32
			12.79
	Chloroform	50	8.47	8.32	1.08282
			9.32
			7.17
		100	10.95	11.6467	0.61825
			11.86
			12.13
		CHX	12.61	13.34	0.725052
			13.35
			14.06
