# Supplementary material for: Antimicrobial activity of Ruta angustifolia L. Pers against periodontal pathogen: Porphyromonas gingivalis
Source: PeerJ. 2024 Dec 18;12:e18751. doi: 10.7717/peerj.18751 (PMC11662893; doi:10.7717/peerj.18751)
Supplement: Supplemental Information 2 — Raw data of untreated P. gingivalis in BHI-T broth with 1% DMSO served as the negative control. [file peerj-12-18751-s002.xlsx]

## Sheet: Sheet1
Table A: Optical density of untreated P. gingivalis bacterial cells.
Absorbances (OD600)
P. gingivalis + BHI-T broth					P. gingivalis + BHI-T broth + 1% DMSO
1st	2nd	3rd	Mean	Stdev	1st	2nd	3rd	Mean	Stdev
0.387	0.375	0.368	0.376667	0.00960902	0.396	0.382	0.365	0.381	0.0155242
0.407	0.397	0.385	0.396333	0.0110151	0.378	0.411	0.389	0.392667	0.0168028
0.377	0.382	0.394	0.384333	0.00873689	0.384	0.408	0.373	0.388333	0.0178979
Untreated P. gingivalis in BHI-T broth with 1% DMSO served as the negative control.
											Figure A: Untreated samples of P. gingivalis bacterial cells in (1) BHI-T broth and (2) BHI-T broth with 1% DMSO.
