# Supplementary material for: Antimicrobial activity of Ruta angustifolia L. Pers against periodontal pathogen: Porphyromonas gingivalis
Source: PeerJ. 2024 Dec 18;12:e18751. doi: 10.7717/peerj.18751 (PMC11662893; doi:10.7717/peerj.18751)
Supplement: Supplemental Information 3 — Raw data for the effect of chloroform fractionated extract of R. angustifolia against P. gingivalis biofilm via the crystal violet assay. The untreated P. gingivalis biofilm, is the negative control. Experiments were conducted in triplicate and values are represented as mean ± standard deviation. Statistically significant with ANOVA (p-value < 0.05) and Tukey’s HSD post hoc analysis (*p < 0.05, **p < 0.001 versus control according to analysis of variance). [file peerj-12-18751-s003.xlsx]

## Sheet: Sheet1
Figure 2: Effect of chloroform fractionated extract of R. angustifolia against P. gingivalis biofilm.
Concentrations (mg/mL)	Absorbances (OD550)	Mean	Stdev
Control	0.06119	0.0688033	0.0088211
	0.07847
	0.06675
1.56	0.0433	0.0361	0.00710211
	0.0291
	0.0359
3.13	0.034	0.0227333	0.00978996
	0.0163
	0.0179
6.25	0.00609	0.00781333	0.00567477
	0.0032
	0.01415
12.5	0.00275	0.00598333	0.00375378
	0.0101
	0.0051

## Sheet: Sheet2
	Mean	Stdev
	0.0688033	0.0088211
	0.0361	0.00710211
	0.0227333	0.00978996
	0.00781333	0.00567477
	0.00598333	0.00375378
